# Supplementary material
Source: PubMed Central journal article supplement (PMC3064482)
Supplement: NIHMS252817-supplement-Supp1.pdf [file NIHMS252817-supplement-Supp1.pdf]

## SUPPLEMENT MATERIAL

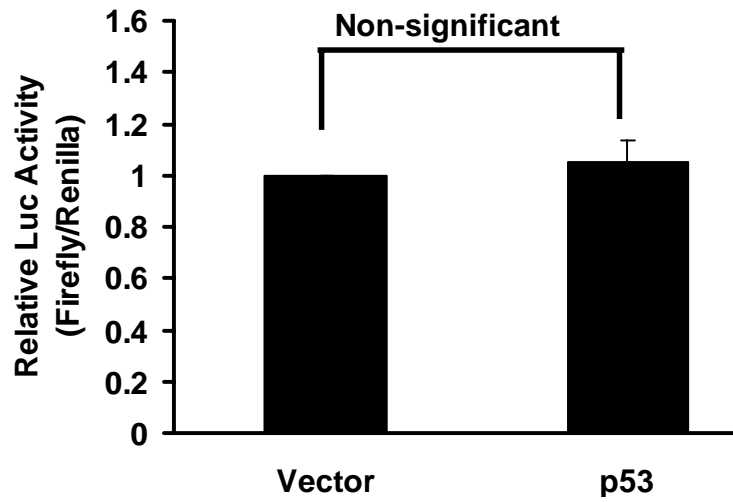

**Fig I- p53 has no effect on basic pGL3 luciferase activity.** Activity of the promoterless pGL3-Luc was measured in 293 in presence and absence of p53. Data is representative of three independent experiments.

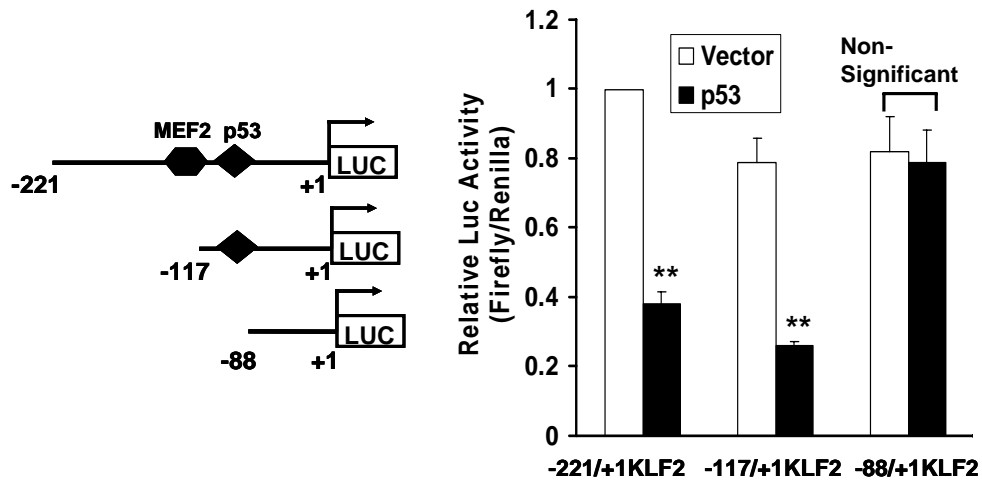

**Fig II- A 27 bp sequence in the KLF2 promoter is a p53 element.** Relative activities of each of the indicated KLF2 promoter-reporter constructs shown were assessed in HEK 293 cells with or without p53 expression. Numbers indicate nucleotides relative to the transcription start site. \*\* $p < 0.01$  (n=3).
